# Supplementary material for: Identification of circular RNAs as a promising new class of diagnostic biomarkers for human breast cancer
Source: PubMed Central journal article supplement (PMC5546465; doi:10.18632/oncotarget.17307), 2017-04-21
Supplement: oncotarget-08-44096-s001.pdf [file oncotarget-08-44096-s001.pdf]

## Identification of circular RNAs as a promising new class of diagnostic biomarkers for human breast cancer

### SUPPLEMENTARY MATERIALS

### SUPPLEMENTARY TABLES AND FIGURES

**Supplementary Table 1: Detailed information about the four patients included in the microarray analysis**

| No | Ages | Ethnic      | Menopausal | TNM    | ER       | PR       | HER2     | Histological type         |
|----|------|-------------|------------|--------|----------|----------|----------|---------------------------|
| 1  | 46   | Chinese Han | pre-       | T2N0M0 | positive | positive | negative | invasive ductal carcinoma |
| 2  | 62   | Chinese Han | post-      | T2N0M0 | positive | positive | positive | invasive ductal carcinoma |
| 3  | 41   | Chinese Han | pre-       | T2N2M0 | positive | negative | negative | invasive ductal carcinoma |
| 4  | 74   | Chinese Han | post-      | T1N0M0 | negative | negative | positive | invasive ductal carcinoma |

**Supplementary Table 2: The circRNA levels ( $\Delta Ct$ ) and clinical factors of patients with breast cancer**

See Supplementary File 1

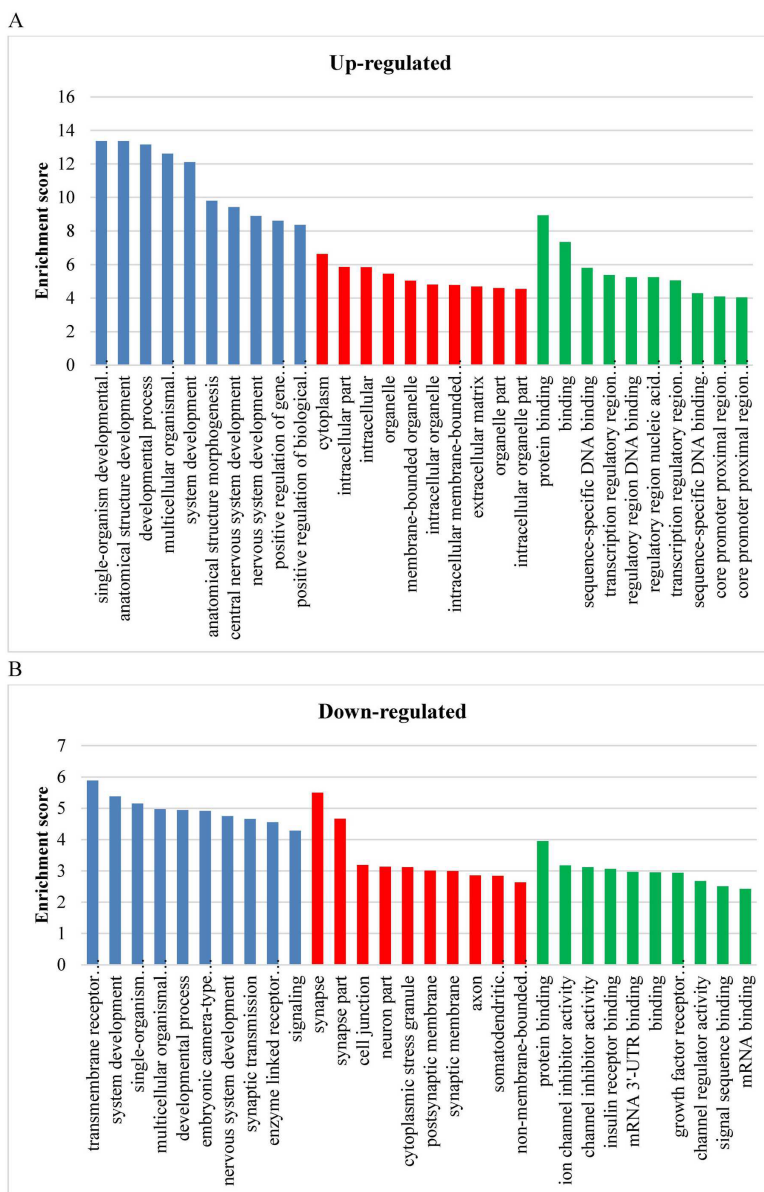

**Supplementary Figure 1: GO analysis of the biological functions of circRNA target genes. (A)** GO annotation corresponding to the target genes of upregulated circRNAs. **(B)** GO annotation corresponding to the target genes of downregulated circRNAs.

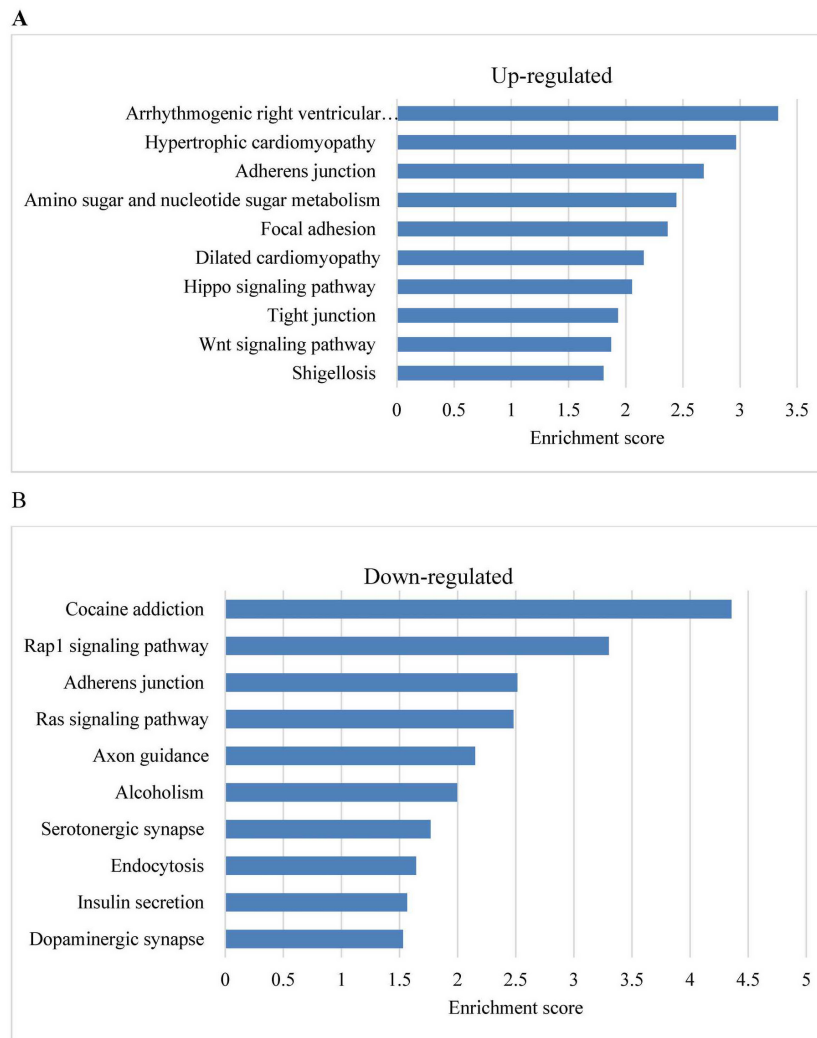

**Supplementary Figure 2: KEGG pathway analysis.** (A) Pathways corresponding to upregulated circRNAs. (B) Pathways corresponding to downregulated circRNAs.

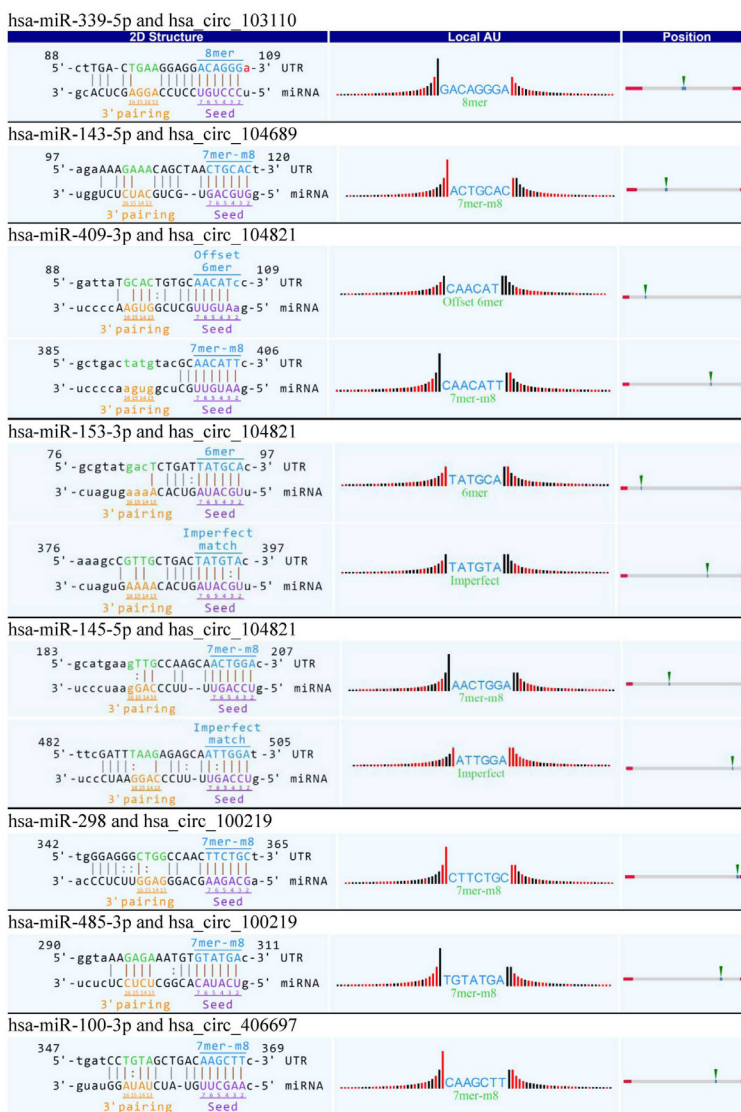

**Supplementary Figure 3: Detailed annotation of circRNA/miRNA interactions.** The 2D structure displays the MRE sequence, the target miRNA seed type (7mer-m8, 8mer, 6mer, offset 6mer, imperfect) and the pairing of target miRNA nucleotides 13-16. The precise base positions are shown in the alignments in the upper left and right corners. The “local AU” displays the 30 nucleotides upstream and downstream of the seed sequence. Black bars stand for G/C and low accessibility. Red bars stand for A/U and high accessibility of the seed. The height of the bar represents the extent of accessibility. The position column displays the most likely relative MRE position on the linearized circRNA sequence.

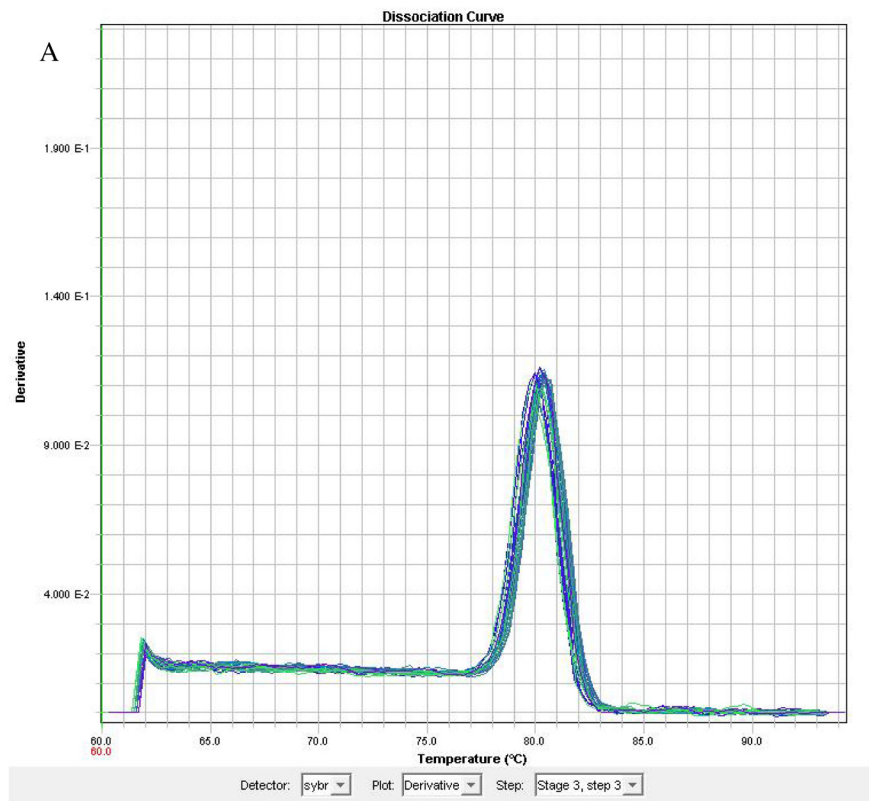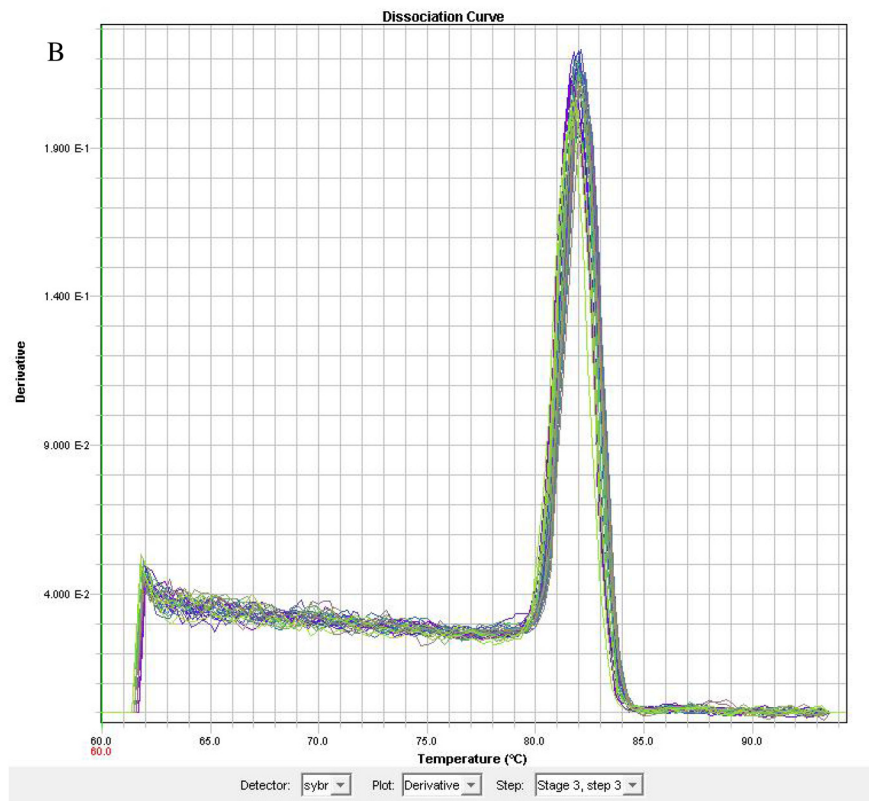

(Continued)

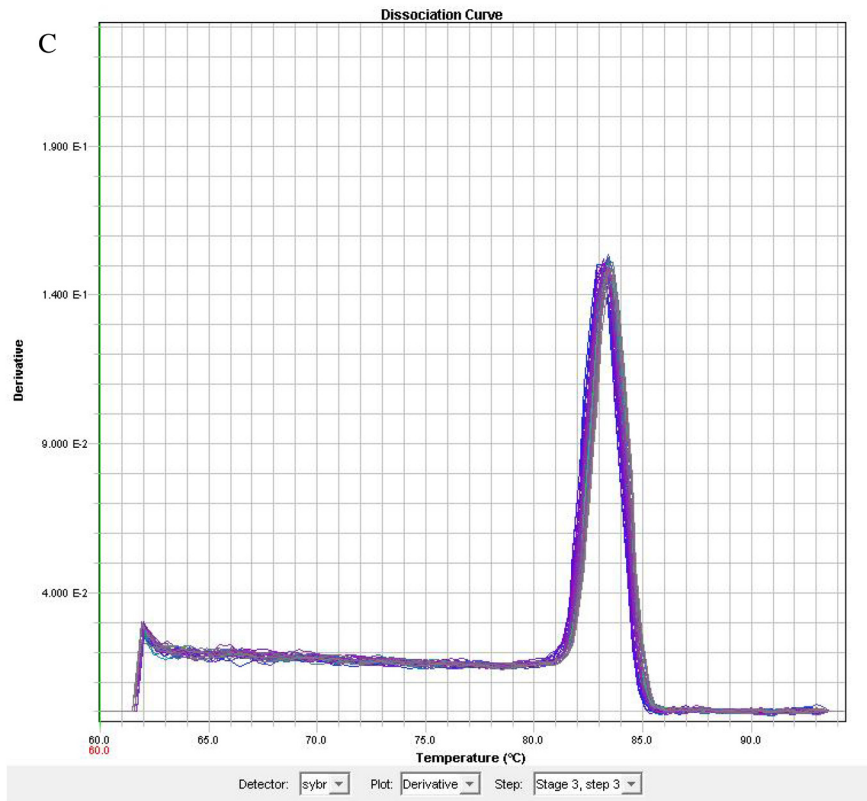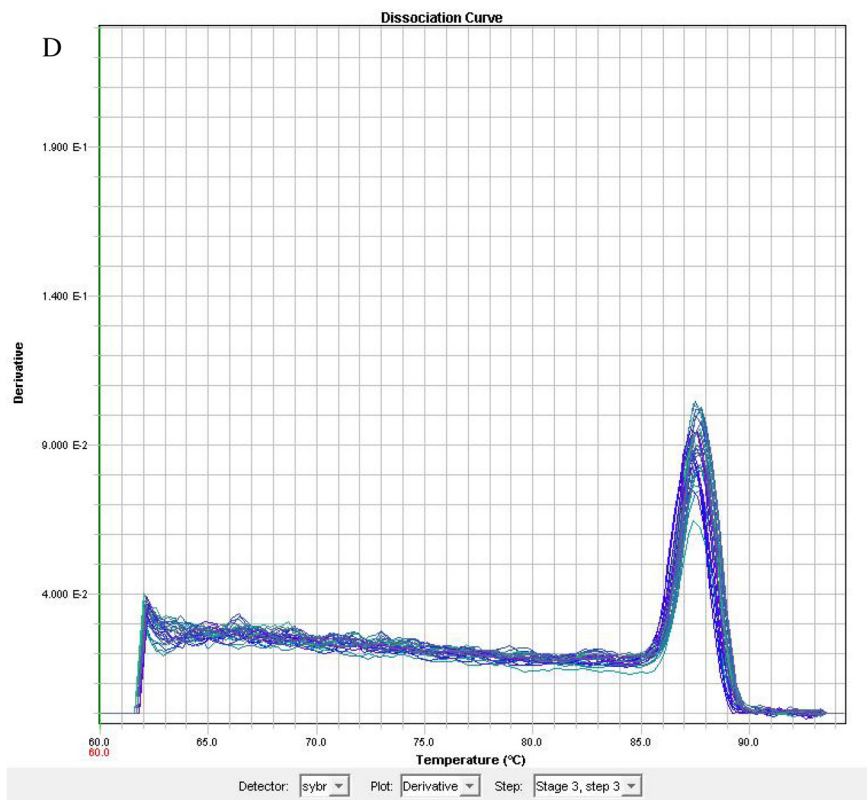

(Continued)

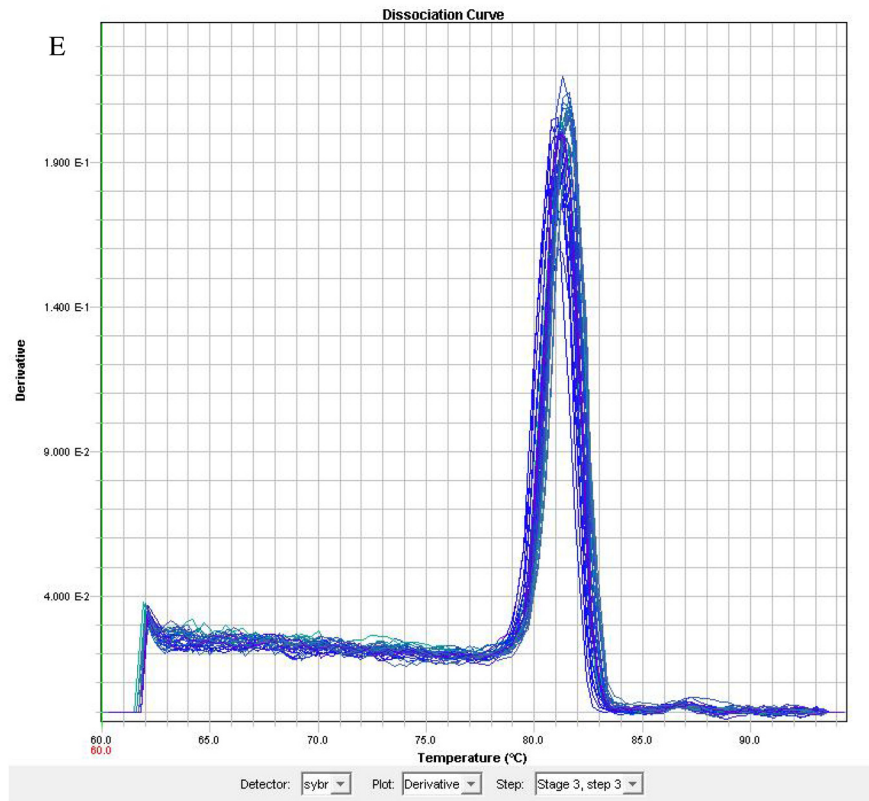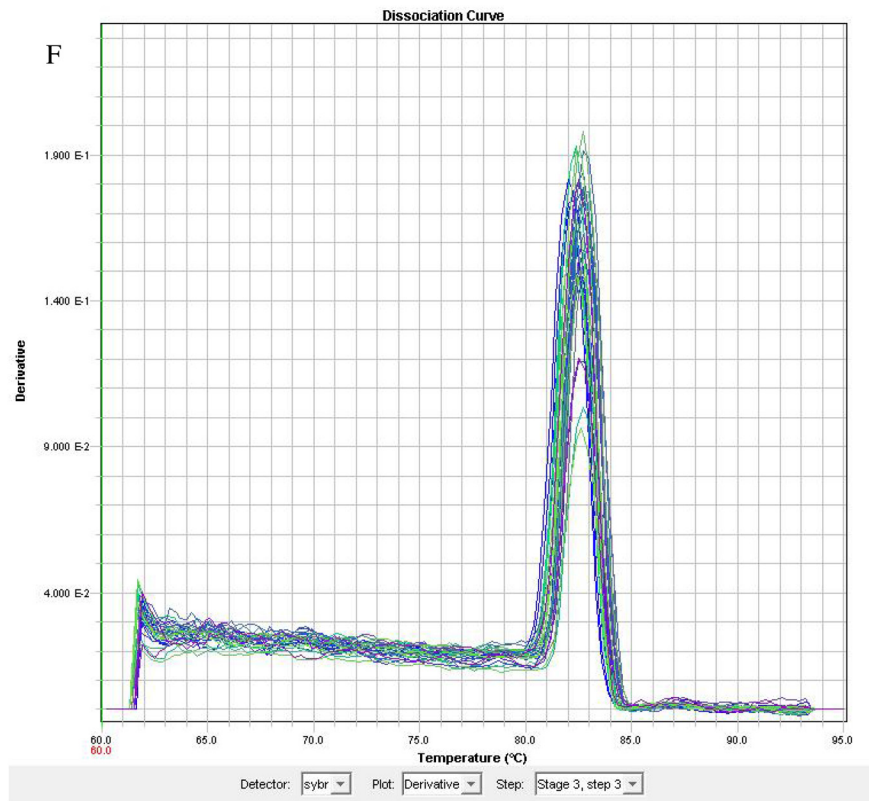

(Continued)

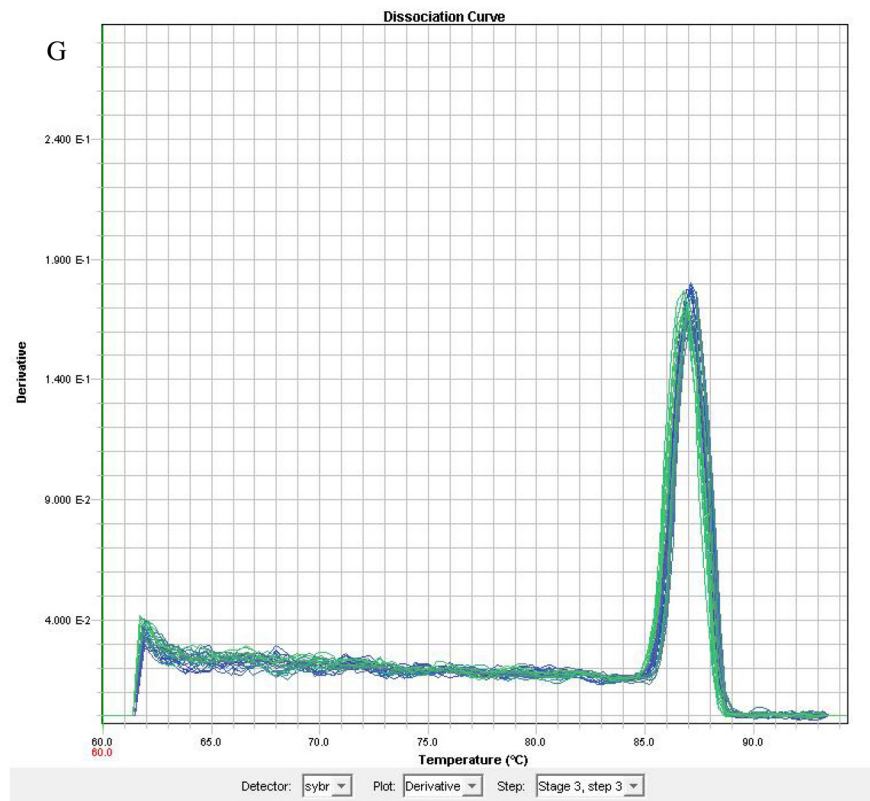

**Supplementary Figure 4: Melting curves of differentially expressed circRNAs. (A) hsa\_circ\_103110; (B) hsa\_circ\_104689; (C) hsa\_circ\_104821; (D) hsa\_circ\_006054; (E) hsa\_circ\_100219; (F) hsa\_circ\_406697; (G) GAPDH.**
